# Supplementary material for: Ba1−xSrxFeO3−δ as an improved oxygen storage material for chemical looping air separation: a computational and experimental study
Source: Royal Society of Chemistry journal article supplement (doi:10.1039/d4se01440e), 2025-01-01
Supplement: d4se01440e1.pdf [file d4se01440e1.pdf]

## Supplementary Information

### Ba<sub>1-x</sub>Sr<sub>x</sub>FeO<sub>3-δ</sub> as an Improved Oxygen Storage Material for Chemical Looping Air Separation: A Computational and Experimental Study

Shree Ram Acharya<sup>\*a,b</sup>; Eric J. Popczun<sup>a,b</sup>; Hari P. Paudel<sup>a,b</sup>; Sittichai Natesakhawat<sup>a,b</sup>; Jonathan W. Lekse<sup>a</sup>; Yuhua Duan<sup>a</sup>

<sup>a</sup>National Energy Technology Laboratory, United States Department of Energy, 626 Cochran Mill Road, Pittsburgh, PA 15236, USA.

<sup>b</sup>NETL Support Contractor, 626 Cochran Mill Road, Pittsburgh, PA 15236, USA

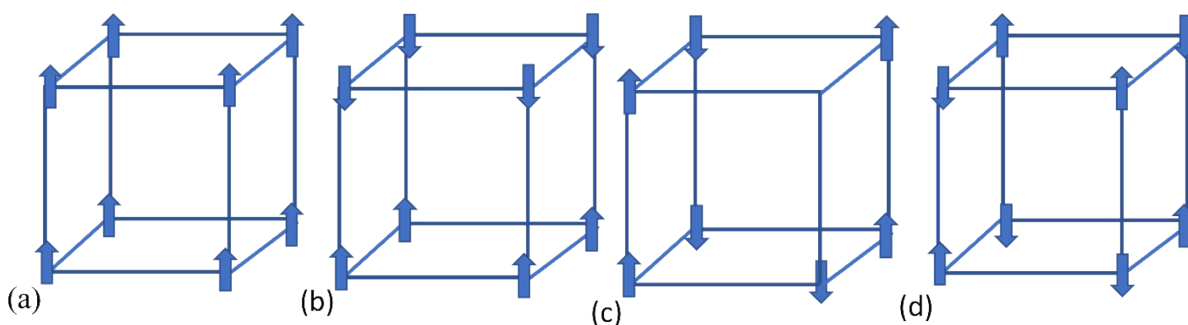

Fig. S1. Schematic representation of the four different magnetic states tested computationally in this study: (a) Ferromagnetic (FM), (b) A-type anti-ferromagnetic (A-AFM), (c) C-AFM, and (d) G-AFM.

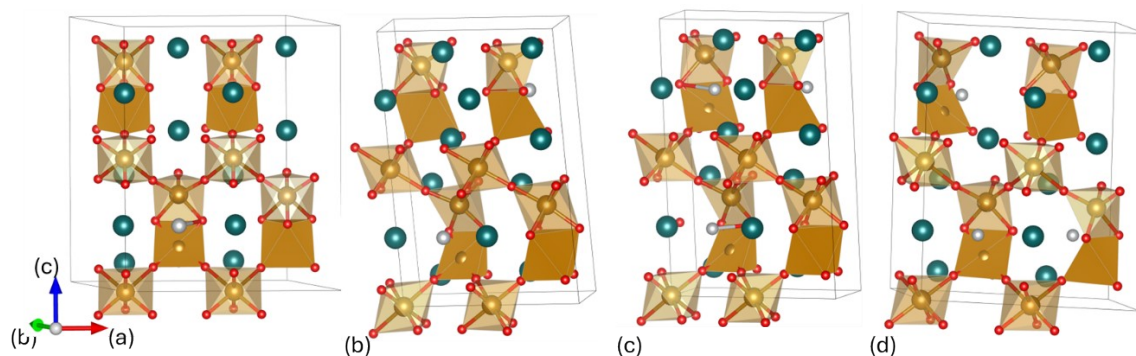

Fig. S2. Atomistic models of (a) BaFeO<sub>2.917</sub>, (b) BaFeO<sub>2.834</sub>, (c) BaFeO<sub>2.75</sub>, and (d) BaFeO<sub>2.667</sub> OSMs. The green, gold, and red, spheres represent Ba, Fe, and O lattice sites, respectively. The oxygen vacancy sites are shown with sphere (gray colored) for visual convenience.

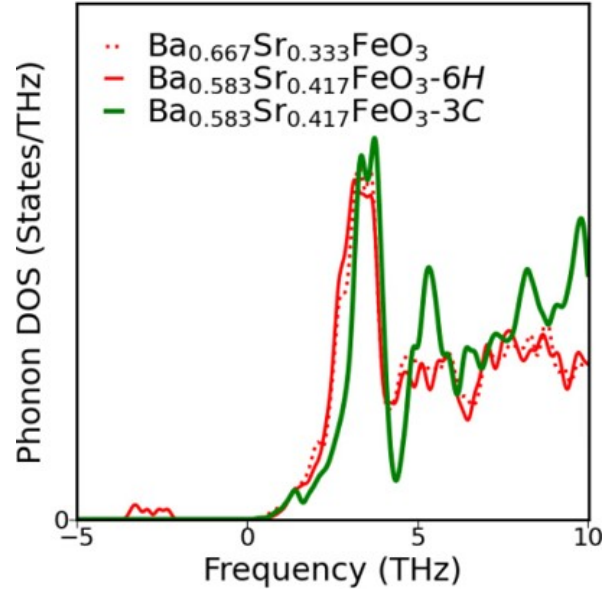

Fig. S3. The phonon density of states of  $\text{Ba}_{1-x}\text{Sr}_x\text{FeO}_{3-6}$  ( $x = 0.333, 0.417$ ) OSMs in hexagonal and cubic phases. The phonon density of states of  $\text{Ba}_{0.583}\text{Sr}_{0.417}\text{FeO}_3$  depicts that the OSM in cubic phase are stable but the hexagonal phase is unstable due to presence of vibrational mode with imaginary frequency.

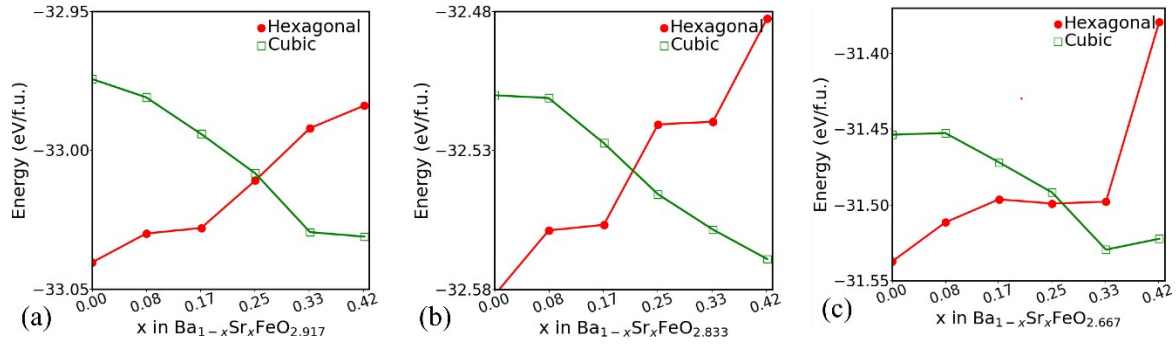

Fig. S4. Variation of energy per formula unit of the (a)  $\text{Ba}_{1-x}\text{Sr}_x\text{FeO}_{2.917}$  (b)  $\text{Ba}_{1-x}\text{Sr}_x\text{FeO}_{2.833}$  and (c)  $\text{Ba}_{1-x}\text{Sr}_x\text{FeO}_{2.667}$  formed on hexagonal and cubic based phases with concentration of substituted Sr cations at  $x = 0.083, 0.167, 0.25, 0.333$ , and  $0.417$ .

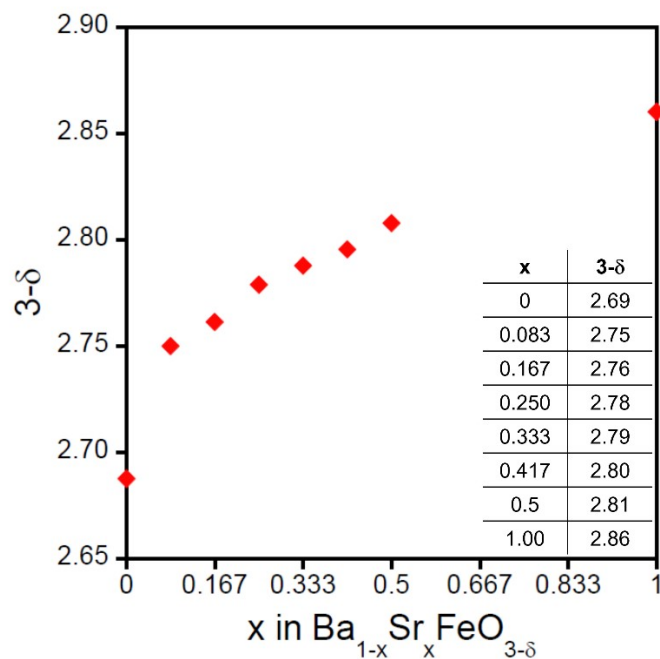

Fig. S5. Oxygen stoichiometry of as-synthesized systems determined by thermogravimetric analysis. We observe a consistent increase of  $3-\delta$  as the  $\text{Sr}^{2+}$  content is increased. The hexagonal phase in  $\text{BaFeO}_{2.69}$  is consistent with Parras et al.<sup>1</sup>.

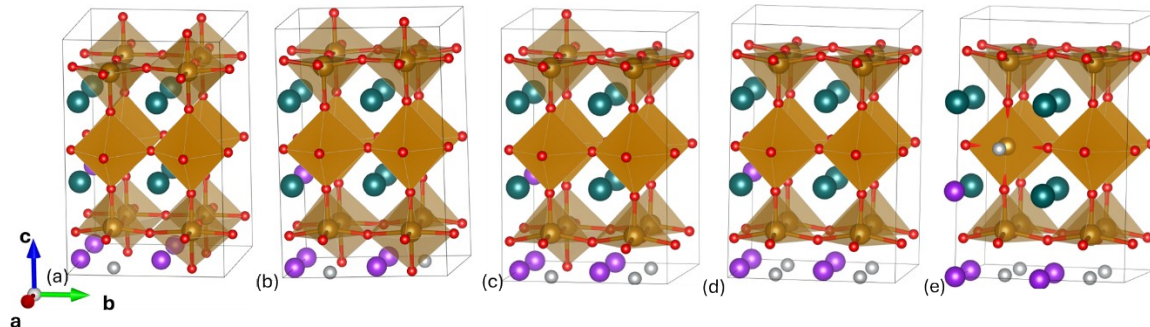

Fig. S6. Atomistic models of  $\text{Ba}_{0.583}\text{Sr}_{0.417}\text{FeO}_{3-\delta}$  OSMs for (a)  $\delta = 0.083$ , (b)  $\delta = 0.167$ , (c)  $\delta = 0.25$ , (d)  $\delta = 0.333$ , and (e)  $\delta = 0.5$ . The green, gold, red, and gray spheres represent Ba, Fe, O, and oxygen vacancy sites, respectively. At Sr substitution concentration ( $x$ ) of 0.417, the cubic  $\text{Ba}_{1-x}\text{Sr}_x\text{FeO}_{3-\delta}$  OSMs are energetically preferred. As shown in (a-e), structures with oxygen vacancies at the apical sites are energetically preferred. Note the co-planar arrangement of the substituted  $\text{Sr}^{2+}$  cations and the oxygen vacancies in these models.

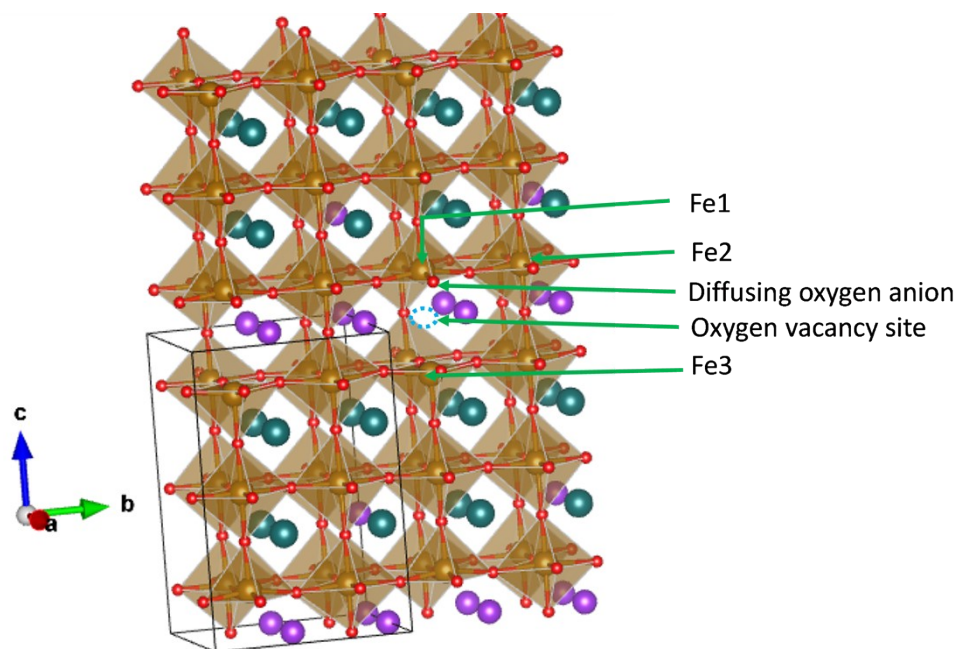

Fig. S7. The supercell model of the  $\text{Ba}_{0.583}\text{Sr}_{0.417}\text{FeO}_{2.958}$  to show the diffusing oxygen anion on equatorial plane, it's targeted oxygen vacancy site on apical plane, and the nearby Fe atoms whose distance to diffusing oxygen anion are reported in table S3. The Fe1 and Fe2 are Fes nearby the diffusing oxygen on the same plane in initial configuration while Fe3 is close to the oxygen vacancy site.

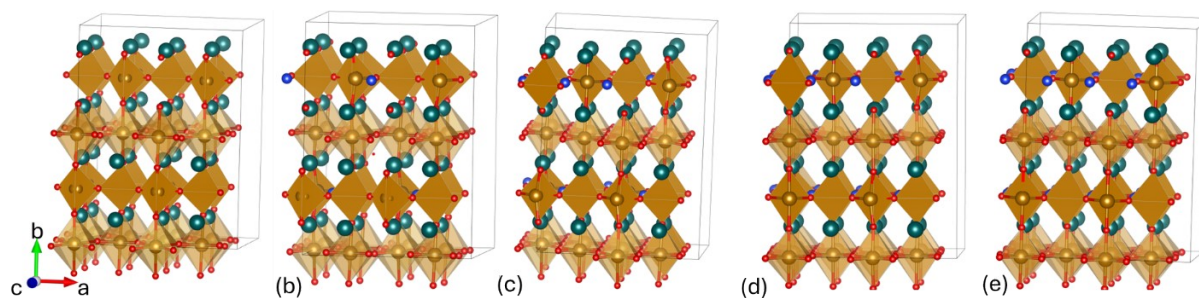

Fig. S8. Atomistic models of  $\text{BaFeO}_{2.5+\delta}$  OSMs for (a)  $\delta = 0$ , (b)  $\delta = 0.125$ , (c)  $\delta = 0.25$ , (d)  $\delta = 0.375$ , and (e)  $\delta = 0.5$ . The green, gold, red, and small sized blue spheres represent Ba, Fe, O, and absorbed oxygen that oxidize brownmillerite structure, respectively.

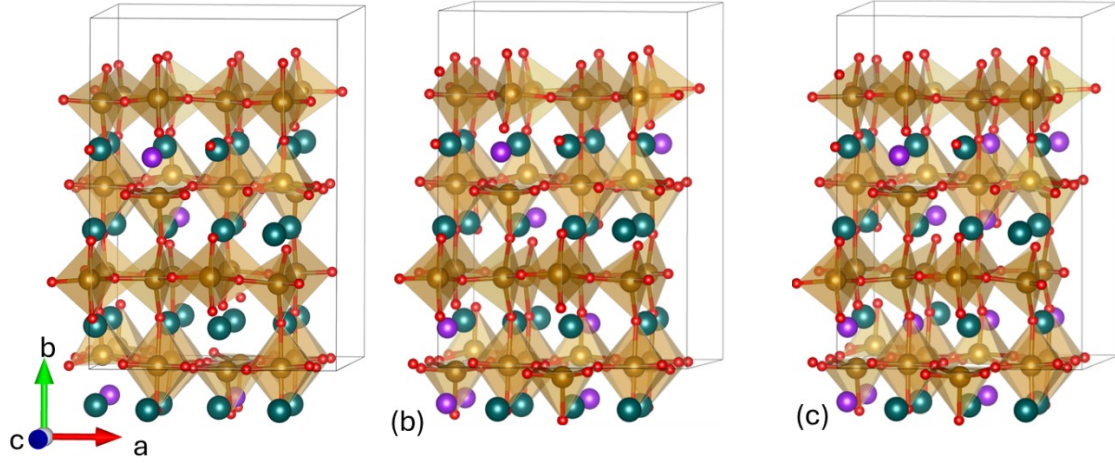

Fig. S9. Atomistic models of  $\text{Ba}_{1-x}\text{Sr}_x\text{FeO}_{2.5}$  OSMs with (a)  $x = 0.125$ , (b)  $x = 0.25$ , and (c)  $x = 0.375$ . The green, gold, red, and purple spheres represent Ba, Fe, O, and Sr atoms, respectively.

**Table S1.** The difference of total energy per formula unit ( $\Delta E$ ) of three representative compounds namely  $\text{BaFeO}_3$  of pristine system,  $\text{Ba}_{0.583}\text{Sr}_{0.417}\text{FeO}_3$  of Sr substituted system, and  $\text{Ba}_{0.583}\text{Sr}_{0.417}\text{FeO}_{2.917}$  of Sr substituted with oxygen vacancy system in A-type antiferromagnetic (A-AFM), C-AFM, G-AFM, and non-magnetic configurations relative to that of ferromagnetic (FM) configuration. The positive values imply the energetic preference of FM configuration.

| Compound                                               | $\Delta E(\text{A-AFM})$ | $\Delta E(\text{C-AFM})$ | $\Delta E(\text{G-AFM})$ | $\Delta E(\text{Non-Magnetic})$ |
|--------------------------------------------------------|--------------------------|--------------------------|--------------------------|---------------------------------|
| $\text{BaFeO}_3$                                       | 80                       | 143                      | 247                      | 2813                            |
| $\text{Ba}_{0.583}\text{Sr}_{0.417}\text{FeO}_3$       | 78                       | 173                      | 271                      | 2755                            |
| $\text{Ba}_{0.583}\text{Sr}_{0.417}\text{FeO}_{2.917}$ | 35                       | 106                      | 165                      | 2733                            |

**Table S2.** The lattice parameters of the stoichiometric  $\text{Ba}_{1-x}\text{Sr}_x\text{FeO}_{3-\delta}$  OSMs on hexagonal and cubic phases. The measured values reported in Clemens et al.<sup>2</sup> are given in parentheses.

| $\text{Ba}_{1-x}\text{Sr}_x\text{FeO}_{3-\delta}$ | $\delta$ | Hexagonal        |         |                    |                        | Cubic   |         |         |                        |
|---------------------------------------------------|----------|------------------|---------|--------------------|------------------------|---------|---------|---------|------------------------|
|                                                   |          | $a$ (Å)          | $b$ (Å) | $c$ (Å)            | Vol. (Å <sup>3</sup> ) | $a$ (Å) | $b$ (Å) | $c$ (Å) | Vol. (Å <sup>3</sup> ) |
| $x = 0.083$                                       | 0        | 5.639<br>(5.654) | 5.641   | 13.795<br>(13.906) | 63.337                 | 3.947   | 3.947   | 3.954   | 61.592                 |
|                                                   | 0.083    | 5.646            | 5.654   | 13.865             | 63.856                 | 3.955   | 3.955   | 3.945   | 62.026                 |
|                                                   | 0.167    | 5.652            | 5.678   | 13.933             | 63.489                 | 3.961   | 3.961   | 3.978   | 62.397                 |
|                                                   | 0.25     | 5.669            | 5.685   | 14.015             | 63.106                 | 3.955   | 3.955   | 4.032   | 63.075                 |
|                                                   | 0.333    | 5.715            | 5.718   | 14.021             | 65.801                 | 3.962   | 4.007   | 4.058   | 64.431                 |
| $x = 0.167$                                       | 0        | 5.623<br>(5.634) | 5.625   | 13.779<br>(13.882) | 62.897                 | 3.937   | 3.938   | 3.945   | 61.161                 |
|                                                   | 0.083    | 5.633            | 5.637   | 13.837             | 63.397                 | 3.949   | 3.947   | 3.948   | 61.541                 |
|                                                   | 0.167    | 5.648            | 5.642   | 13.905             | 63.981                 | 3.966   | 3.937   | 3.967   | 61.945                 |
|                                                   | 0.25     | 5.657            | 5.660   | 13.896             | 64.211                 | 3.985   | 3.954   | 3.958   | 62.358                 |

|           |       |       |       |        |        |       |       |       |        |
|-----------|-------|-------|-------|--------|--------|-------|-------|-------|--------|
|           | 0.333 | 5.656 | 5.705 | 13.928 | 65.028 | 4.012 | 3.937 | 3.979 | 62.852 |
| x = 0.25  | 0     | 5.609 | 5.607 | 13.760 | 62.464 | 3.929 | 3.929 | 3.933 | 60.722 |
|           | 0.083 | 5.620 | 5.626 | 13.830 | 63.068 | 3.939 | 3.939 | 3.932 | 61.028 |
|           | 0.167 | 5.639 | 5.631 | 13.889 | 63.605 | 3.943 | 3.943 | 3.951 | 61.422 |
|           | 0.25  | 5.647 | 5.649 | 13.947 | 64.292 | 3.939 | 3.939 | 3.976 | 61.675 |
|           | 0.333 | 5.654 | 5.684 | 13.929 | 64.727 | 3.982 | 3.945 | 3.952 | 62.085 |
| x = 0.333 | 0     | 5.592 | 5.592 | 13.736 | 61.996 | 3.919 | 3.919 | 3.923 | 60.262 |
|           | 0.083 | 5.606 | 5.617 | 13.799 | 62.720 | 3.931 | 3.931 | 3.917 | 60.529 |
|           | 0.167 | 5.630 | 5.638 | 13.850 | 63.354 | 3.956 | 3.912 | 3.924 | 60.707 |
|           | 0.25  | 5.653 | 5.641 | 13.885 | 63.826 | 3.928 | 3.928 | 3.956 | 61.041 |
|           | 0.333 | 5.689 | 5.676 | 13.903 | 64.517 | 3.932 | 3.932 | 3.959 | 61.209 |
| x = 0.417 | 0     | 5.578 | 5.578 | 13.712 | 61.576 | 3.909 | 3.909 | 3.913 | 59.804 |
|           | 0.083 | 5.589 | 5.593 | 13.782 | 62.165 | 3.921 | 3.921 | 3.909 | 60.093 |
|           | 0.167 | 5.604 | 5.619 | 13.823 | 62.857 | 3.924 | 3.924 | 3.927 | 60.489 |
|           | 0.25  | 5.632 | 5.638 | 13.778 | 63.251 | 3.919 | 3.919 | 3.949 | 60.664 |
|           | 0.333 | 5.639 | 5.658 | 13.808 | 63.697 | 3.922 | 3.922 | 3.956 | 60.857 |

**Table S3.** The variation of the distance of diffusing oxygen to nearby Fe in  $\text{Ba}_{0.583}\text{Sr}_{0.417}\text{FeO}_{2.958}$  and  $\text{Sr}_{0.75}\text{Ca}_{0.25}\text{FeO}_{2.958}$  at different reaction coordinates in the diffusion pathway from equatorial site to vacancy on apical site. The Fe1, Fe2 and Fe3 cations are labelled Fig. S7.

| Rxn.<br>Coor. | $\text{Ba}_{0.583}\text{Sr}_{0.417}\text{FeO}_{2.958}$ |                               |                               | $\text{Sr}_{0.75}\text{Ca}_{0.25}\text{FeO}_{2.958}$ |                               |                               |
|---------------|--------------------------------------------------------|-------------------------------|-------------------------------|------------------------------------------------------|-------------------------------|-------------------------------|
|               | $d(\text{Fe1-O})(\text{\AA})$                          | $d(\text{Fe2-O})(\text{\AA})$ | $d(\text{Fe3-O})(\text{\AA})$ | $d(\text{Fe1-O})(\text{\AA})$                        | $d(\text{Fe2-O})(\text{\AA})$ | $d(\text{Fe3-O})(\text{\AA})$ |
| 0             | 1.88                                                   | 2.094                         | 4.201                         | 1.853                                                | 2.004                         | 4.039                         |
| 1             | 1.805                                                  | 2.385                         | 3.811                         | 1.843                                                | 2.068                         | 3.792                         |
| 2             | 1.753                                                  | 2.799                         | 3.334                         | 1.801                                                | 2.421                         | 3.311                         |
| 3             | 1.744                                                  | 3.255                         | 2.857                         | 1.777                                                | 2.94                          | 2.754                         |
| 4             | 1.765                                                  | 3.608                         | 2.49                          | 1.801                                                | 3.286                         | 2.367                         |
| 5             | 1.816                                                  | 3.933                         | 2.151                         | 1.842                                                | 3.595                         | 2.059                         |
| 6             | 1.850                                                  | 4.188                         | 1.995                         | 1.856                                                | 3.809                         | 1.949                         |

**Table S4.**

The DFT computed energy (per f.u.), lattice parameters, and volume of  $\text{Ba}_{1-x}\text{Sr}_x\text{FeO}_{2.5+\delta}$  OSMS.

| Compound                    | $\delta$ | $E(\text{Ba}_{1-x}\text{Sr}_x\text{FeO}_{2.5+\delta})$<br>(eV/f.u.) | $a(\text{\AA})$ | $b(\text{\AA})$ | $c(\text{\AA})$ | Vol. ( $\text{\AA}^3$ ) |
|-----------------------------|----------|---------------------------------------------------------------------|-----------------|-----------------|-----------------|-------------------------|
| $\text{BaFeO}_{2.5+\delta}$ | 0.0      | -30.301                                                             | 5.804           | 15.560          | 5.891           | 531.99                  |
|                             | 0.125    | -31.167                                                             | 5.733           | 15.741          | 5.768           | 520.42                  |
|                             | 0.25     | -31.958                                                             | 5.696           | 15.846          | 5.671           | 511.86                  |

|                                                           |       |         |       |        |       |        |
|-----------------------------------------------------------|-------|---------|-------|--------|-------|--------|
|                                                           | 0.375 | -32.682 | 5.653 | 15.790 | 5.646 | 503.96 |
|                                                           | 0.5   | -33.372 | 5.668 | 15.625 | 5.668 | 502.04 |
| $\text{Ba}_{0.75}\text{Sr}_{0.25}\text{FeO}_{2.5+\delta}$ | 0.0   | -30.358 | 5.723 | 15.668 | 5.828 | 522.72 |
|                                                           | 0.125 | -31.200 | 5.616 | 16.087 | 5.670 | 512.32 |
|                                                           | 0.25  | -31.983 | 5.566 | 16.421 | 5.596 | 511.48 |
|                                                           | 0.375 | -32.711 | 5.585 | 15.745 | 5.586 | 491.28 |
|                                                           | 0.5   | -33.441 | 5.555 | 15.716 | 5.555 | 484.99 |
| $\text{Ba}_{0.5}\text{Sr}_{0.5}\text{FeO}_{2.5+\delta}$   | 0.0   | -30.408 | 5.573 | 16.417 | 5.706 | 522.06 |
|                                                           | 0.125 | -31.211 | 5.561 | 16.081 | 5.616 | 502.24 |
|                                                           | 0.25  | -31.981 | 5.515 | 16.334 | 5.547 | 499.69 |
|                                                           | 0.375 | -32.726 | 5.545 | 15.633 | 5.545 | 480.62 |
|                                                           | 0.5   | -33.475 | 5.516 | 15.582 | 5.516 | 474.15 |

**Table S5.** The oxygen storage capacity (OSC), reduction rate (Red. Rate), and oxidation rate (Ox. Rate) of  $\text{Ba}_{1-x}\text{Sr}_x\text{FeO}_3$  at 325 °C and 350 °C using results of cyclic TGA measurements shown in Fig. 10. Reduction rate and oxidation rate were determined by the difference in mass after the first minute of reduction or oxidation, respectively. The values listed for  $\text{Sr}_{0.7}\text{Ca}_{0.3}\text{FeO}_3$  are included for comparison.

| Oxygen Storage Material                        | OSC (325°C, wt%) | Red. Rate (325°C, wt%/min) | Ox. Rate (325°C, wt%/min) | OSC (350°C, wt%) | Red. Rate (350°C, wt%/min) | Ox. Rate (350°C, wt%/min) |
|------------------------------------------------|------------------|----------------------------|---------------------------|------------------|----------------------------|---------------------------|
| $\text{BaFeO}_3$                               | 0.670%           | 0.021%                     | 0.051%                    | 0.935%           | 0.070%                     | 0.104%                    |
| $\text{Ba}_{0.92}\text{Sr}_{0.08}\text{FeO}_3$ | 0.453%           | 0.006%                     | 0.011%                    | 0.945%           | 0.040%                     | 0.051%                    |
| $\text{Ba}_{0.83}\text{Sr}_{0.17}\text{FeO}_3$ | 0.874%           | 0.020%                     | 0.083%                    | 1.213%           | 0.070%                     | 0.243%                    |
| $\text{Ba}_{0.75}\text{Sr}_{0.25}\text{FeO}_3$ | 0.792%           | 0.012%                     | 0.107%                    | 1.098%           | 0.092%                     | 0.353%                    |
| $\text{Ba}_{0.67}\text{Sr}_{0.33}\text{FeO}_3$ | 0.614%           | 0.020%                     | 0.109%                    | 0.906%           | 0.072%                     | 0.335%                    |
| $\text{Ba}_{0.58}\text{Sr}_{0.42}\text{FeO}_3$ | 0.568%           | 0.020%                     | 0.114%                    | 0.840%           | 0.053%                     | 0.338%                    |
| $\text{Ba}_{0.5}\text{Sr}_{0.5}\text{FeO}_3$   | 0.559%           | 0.028%                     | 0.149%                    | 0.803%           | 0.080%                     | 0.412%                    |
| $\text{SrFeO}_3$                               | 0.932%           | 0.032%                     | 0.129%                    | 0.902%           | 0.145%                     | 0.536%                    |
| $\text{Sr}_{0.7}\text{Ca}_{0.3}\text{FeO}_3$   | 0.593%           | 0.016%                     | 0.059%                    | 1.323%           | 0.041%                     | 0.125%                    |

## References:

1. M. Parras, M. Vallet-Regi, J.M. Gonzalez-Calbet, and J.C. Grenier, *Oxygen Vacancy Distribution in  $6\text{H BaFeO}_{3-y}$  ( $0.20 \leq y \leq 0.35$ )*, J. Solid. State. Chem. 1989, **83**, 121-131.
2. O. Clemens, R. Haberkorn, P. R. Slater, and H. P. Beck, *Synthesis and Characterisation of the  $\text{Sr}_x\text{Ba}_{1-x}\text{FeO}_{3-y}$ -System and the Fluorinated Phases  $\text{Sr}_x\text{Ba}_{1-x}\text{FeO}_2\text{F}$* , Solid State Sci., 2010, **12**, 1455.
